# Supplementary material for: Efficacy of a group-based brief tobacco intervention among young adults aged 18–20 years in the US Air Force
Source: PubMed Central journal article supplement (PMC8653010; doi:10.18332/tid/143282), 2021-12-08
Supplement: TID-19-95-s1.pdf [file TID-19-95-s1.pdf]

**Supplementary Table 1. Predicting intervention effects on use of tobacco products at follow-up (among participants  $\geq 21$  years of age)**

| Tobacco Product Use at Baseline  | Intervention arm | Tobacco Product Use at 3-month (reference category: Regular Mono Use)<br>OR (95% CI) |                          |
|----------------------------------|------------------|--------------------------------------------------------------------------------------|--------------------------|
|                                  |                  | No use                                                                               | Regular dual or poly use |
| Any regular tobacco mono use     | BTI+AG vs. CTA   | 1.48 (0.32, 6.74)                                                                    | 0.66 (0.06, 7.44)        |
|                                  | AG vs. CTA       | 3.20 (0.51, 19.97)                                                                   | 2.74 (0.38, 19.50)       |
| Regular dual or poly tobacco use | BTI+AG vs. CAT   | 0.88 (0.22, 3.56)                                                                    | 0.37 (0.11, 1.21)        |
|                                  | AG vs. CTA       | 1.12 (0.20, 6.38)                                                                    | 0.26 (0.05, 1.30)        |

**Supplementary Table 2: Predicting intervention effects on use of tobacco products at follow-up among ENDS users at baseline (among participants  $\geq 21$  years of age)**

| Any ENDS Use at Baseline                          | Intervention arm | Tobacco Product Use at 3-month (reference category: Regular Mono Use)<br>OR (95% CI) |                          |
|---------------------------------------------------|------------------|--------------------------------------------------------------------------------------|--------------------------|
|                                                   |                  | No use                                                                               | Regular dual or poly use |
| Regular mono use of ENDS                          | BTI+AG vs. CTA   | 0.51 (0.03, 8.22)                                                                    | 0.25 (0.01, 8.00)        |
|                                                   | AG vs. CTA       | NA                                                                                   | NA                       |
| Regular concurrent use of ENDS and other products | BTI+AG vs. CTA   | 1.02 (0.20, 5.29)                                                                    | 0.42 (0.06, 3.11)        |
|                                                   | AG vs. CTA       | 0.87 (0.09, 8.01)                                                                    | NA                       |

NA: not sufficient information for estimation.
